# Supplementary material
Source: HighWire-hosted journal article supplement (https://gh.bmj.com/content/4/5/e001605)
Supplement: inline-supplementary-material-1 [file inline-supplementary-material-1.pdf]

**Supplementary material**

Caesarean Section in Sierra Leone: A Nationwide Study of Operative Rates and Mortality

**Supplementary table 1.** Facilities performing caesarean sections. Facility type, in-facility deliveries and in-hospital deaths.

|                                              |        | No maternal death in MDSR | ≥1 maternal death in MDSR | ≥1 identified caesarean section death | Cross-validated hospitals** | In-facility caesarean section mortality rate (cross-validated hospitals) |        |       |       |
|----------------------------------------------|--------|---------------------------|---------------------------|---------------------------------------|-----------------------------|--------------------------------------------------------------------------|--------|-------|-------|
|                                              |        |                           |                           |                                       |                             | 0                                                                        | >0-2   | >2-4  | >4    |
| <b>Number of facilities</b>                  | 36     | 12                        | 24                        | 15                                    | 29                          | 14                                                                       | 6      | 5     | 4     |
| District hospital                            | 30     | 11                        | 19                        | 11                                    | 23                          | 12                                                                       | 3      | 4     | 4     |
| Referral hospital                            | 6      | 1                         | 5                         | 4                                     | 6                           | 2                                                                        | 3      | 1     | 0     |
| <b>In-facility deliveries</b>                | 31 614 | 4 529                     | 27 085                    | 20 756                                | 27 716                      | 6 960                                                                    | 11 747 | 6 038 | 2 971 |
| Caesarean sections                           | 7 357  | 763                       | 6 594                     | 5 071                                 | 6 748                       | 1 677                                                                    | 3 351  | 1 167 | 553   |
| Caesarean section rate                       | 23%    | 17%                       | 24%                       | 24%                                   | 24%                         | 24%                                                                      | 29%    | 19%   | 19%   |
| <b>In-facility deaths</b>                    |        |                           |                           |                                       |                             |                                                                          |        |       |       |
| All deaths*                                  | 435    | NA                        | 435                       | 408                                   | 435                         | 27                                                                       | 247    | 76    | 85    |
| Maternal mortality rate                      | 1.4%   | NA                        | 1.6%                      | 2.0%                                  | 1.6%                        | 0.4%                                                                     | 2.1%   | 1.3%  | 2.9%  |
| Deaths with caesarean section                | 99     | NA                        | 99                        | 99                                    | 99                          | NA                                                                       | 40     | 28    | 31    |
| In-facility caesarean section mortality rate | 1.3%   | NA                        | 1.5%                      | 2.0%                                  | 1.5%                        | NA                                                                       | 1.2%   | 2.4%  | 5.6%  |

\* An additional 102 in-facility deaths occurred in primary health care facilities that did not perform caesarean sections; \*\* This excludes seven hospitals which had one or more maternal deaths in logbooks, but no deaths reported through the MDSR system

**Supplementary table 2.** Patient characteristics, clinical management, and secondary outcomes among maternal deaths with caesarean section in Sierra Leone in 2016, with comparisons between three levels of in-facility caesarean section mortality rates (n=99)

|                                        | All              | In-facility caesarean section mortality rate |                  |                 | p-value           |
|----------------------------------------|------------------|----------------------------------------------|------------------|-----------------|-------------------|
|                                        |                  | <2%                                          | 2-4%             | >4%             |                   |
| <b>PATIENT CHARACTERISTICS</b>         | n=99             | n=40                                         | n=28             | n=31            |                   |
| <b>Age</b>                             |                  |                                              |                  |                 |                   |
| Median [IQR]                           | 27 [20 – 32]     | 26 [22 – 33]                                 | 29 [21 – 32]     | 27 [20 – 30]    | 0.38 <sup>a</sup> |
| Unknown                                | 0                | 0                                            | 0                | 0               |                   |
| <b>Gravidity</b>                       |                  |                                              |                  |                 |                   |
| Median [IQR]                           | 3 [1 – 5]        | 3 [2 – 5]                                    | 3 [2 – 5]        | 3 [1 – 5]       | 0.92 <sup>a</sup> |
| Unknown                                | 2 (2%)           | 1 (3%)                                       | 1 (4%)           | 0               |                   |
| <b>Parity</b>                          |                  |                                              |                  |                 |                   |
| Median [IQR]                           | 2 [0 – 4]        | 2 [1 – 3]                                    | 2 [1 – 3]        | 2 [0 – 4]       | 0.83 <sup>a</sup> |
| Unknown                                | 3 (3%)           | 2 (5%)                                       | 1 (4%)           | 0               |                   |
| <b>Number of antenatal care visits</b> |                  |                                              |                  |                 |                   |
| Median [IQR]                           | 3 [2 – 3]        | 3 [3 – 4]                                    | 3 [2 – 3]        | 2 [1 – 3]       | 0.06 <sup>a</sup> |
| Unknown                                | 43 (43%)         | 27 (68%)                                     | 3 (11%)          | 13 (42%)        |                   |
| <b>Referred from</b>                   |                  |                                              |                  |                 | 0.10 <sup>b</sup> |
| Other hospital                         | 2 (2%)           | 2 (5%)                                       | 0                | 0               |                   |
| Primary Healthcare Unit                | 51 (56%)         | 18 (45%)                                     | 15 (54%)         | 18 (75%)        |                   |
| Home                                   | 39 (43%)         | 20 (50%)                                     | 13 (46%)         | 6 (25%)         |                   |
| Unknown                                | 7 (7%)           | 0                                            | 0                | 7 (23%)         |                   |
| <b>Pre-operative haemoglobin level</b> |                  |                                              |                  |                 |                   |
| Median [IQR], g/dL                     | 9.0 [7.4 – 10.5] | 8.5 [5.3 – 10.5]                             | 9.6 [7.2 – 11.5] | 9.0 [8.0 – 9.8] | 0.60 <sup>a</sup> |
| Unknown                                | 50 (51%)         | 32 (80%)                                     | 4 (10%)          | 14 (45%)        |                   |

| CLINICAL MANAGEMENT                              | n=99             | n=40             | n=28             | n=31              |                    |
|--------------------------------------------------|------------------|------------------|------------------|-------------------|--------------------|
| <b>Indication for Caesarean</b>                  |                  |                  |                  |                   |                    |
| Obstructed labour                                | 42 (42%)         | 15 (38%)         | 9 (32%)          | 18 (58%)          | 0.11 <sup>b</sup>  |
| Pre-eclampsia/Eclampsia                          | 25 (25%)         | 9 (22%)          | 9 (33%)          | 7 (23%)           | 0.67 <sup>b</sup>  |
| Haemorrhage                                      | 22 (22%)         | 13 (32%)         | 6 (21%)          | 3 (10%)           | 0.07 <sup>b</sup>  |
| Placental abruption                              | 10 (10%)         | 8 (20%)          | 2 (7%)           | 0                 | 0.01 <sup>b</sup>  |
| Malpresentation                                  | 9 (9%)           | 3 (8%)           | 2 (7%)           | 4 (12%)           | 0.75 <sup>b</sup>  |
| Cranio-pelvic disproportion                      | 7 (7%)           | 2 (5%)           | 1 (4%)           | 4 (13%)           | 0.41 <sup>b</sup>  |
| Twins/triplets                                   | 7 (7%)           | 0                | 4 (14%)          | 3 (10%)           | 0.03 <sup>b</sup>  |
| Uterine rupture                                  | 7 (7%)           | 1 (3%)           | 2 (7%)           | 4 (13%)           | 0.25 <sup>b</sup>  |
| Previous CS                                      | 6 (6%)           | 2 (5%)           | 2 (7%)           | 2 (6%)            | 1.00 <sup>b</sup>  |
| <b>Type of provider</b>                          |                  |                  |                  |                   |                    |
| Medical officer                                  | 53 (55%)         | 14 (35%)         | 19 (66%)         | 20 (69%)          | <0.01 <sup>b</sup> |
| Surgical Training Programme student              | 13 (13%)         | 9 (23%)          | 4 (14%)          | 0 (0%)            |                    |
| Surgical Assistant Community Health Officer      | 11 (11%)         | 5 (13%)          | 3 (10%)          | 3 (13%)           |                    |
| Specialist obstetrician                          | 8 (8%)           | 8 (20%)          | 0                | 0                 |                    |
| House officer                                    | 7 (7%)           | 4 (10%)          | 0                | 3 (10%)           |                    |
| Other associate clinician                        | 5 (5%)           | 0                | 2 (7%)           | 3 (10%)           |                    |
| Unknown                                          | 2 (2%)           | 0                | 0                | 2 (6%)            |                    |
| <b>Time from admission to start of operation</b> |                  |                  |                  |                   |                    |
| Median [IQR], hours                              | 5.8 [2.0 – 21.3] | 5.8 [1.9 – 16.5] | 3.5 [1.9 – 14.3] | 15.4 [4.3 – 26.3] | 0.10 <sup>a</sup>  |
| Unknown                                          | 14 (14%)         | 3 (8%)           | 2 (7%)           | 9 (29%)           |                    |
| <b>Operation length</b>                          |                  |                  |                  |                   |                    |
| Median [IQR], minutes                            | 49 [33 – 69]     | 40 [28 – 52]     | 47 [33 – 59]     | 78 [64 – 103]     | <0.01 <sup>a</sup> |
| Unknown                                          | 32 (32%)         | 9 (23%)          | 6 (21%)          | 17 (55%)          |                    |
| <b>Additional procedures registered</b>          |                  |                  |                  |                   |                    |
| Hysterectomy                                     | 14 (14%)         | 8 (20%)          | 3 (11%)          | 3 (10%)           | 0.47 <sup>b</sup>  |
| B Lynch procedure                                | 3 (3%)           | 3 (8%)           | 0                | 0                 | 0.11 <sup>b</sup>  |
| <b>Blood transfusion</b>                         |                  |                  |                  |                   |                    |
| Patients transfused (proportion)                 | 74 (75%)         | 29 (74%)         | 22 (79%)         | 21 (75%)          | 0.95 <sup>b</sup>  |
| Unknown                                          | 4 (4%)           | 1 (3%)           | 0                | 3 (10%)           |                    |

|                                              |                  |                  |                  |                  |                    |
|----------------------------------------------|------------------|------------------|------------------|------------------|--------------------|
| <b>Number of units transfused</b>            |                  |                  |                  |                  |                    |
| Median [IQR]                                 | 1 [1 – 2]        | 1 [1 – 2]        | 1.5 [1 – 2]      | 2 [0.8 – 2]      | 0.88 <sup>a</sup>  |
| <i>Unknown</i>                               | 6 (6%)           | 3 (8%)           | 0                | 3 (10%)          |                    |
| <b>Type of anaesthesia</b>                   |                  |                  |                  |                  |                    |
| General                                      | 72 (75%)         | 27 (68%)         | 21 (78%)         | 24 (83%)         | 0.32 <sup>b</sup>  |
| Spinal                                       | 19 (20%)         | 10 (25%)         | 6 (22%)          | 3 (10%)          |                    |
| Spinal and general                           | 5 (5%)           | 3 (8%)           | 0                | 2 (7%)           |                    |
| <i>Unknown</i>                               | 3 (3%)           | 0                | 1 (4%)           | 2 (6%)           |                    |
| <b>OUTCOMES</b>                              | <b>n=99</b>      | <b>n=40</b>      | <b>n=28</b>      | <b>n=31</b>      |                    |
| <b>Time from start of operation to death</b> |                  |                  |                  |                  |                    |
| Median [IQR], hours                          | 9.5 [4.4 – 81.5] | 5.4 [3.1 – 16.8] | 9.5 [4.9 – 62.6] | 75 [7.6 – 156.9] | <0.01 <sup>a</sup> |
| <i>Unknown</i>                               | 4 (4%)           | 1 (3%)           | 0                | 3 (10%)          |                    |
| <b>Cause of death<sup>d</sup></b>            |                  |                  |                  |                  |                    |
| Haemorrhage                                  | 64 (73%)         | 32 (84%)         | 18 (72%)         | 14 (56%)         | 0.05 <sup>b</sup>  |
| Hypertensive disorders                       | 20 (23%)         | 8 (21%)          | 7 (28%)          | 5 (20%)          | 0.81 <sup>b</sup>  |
| Sepsis                                       | 12 (14%)         | 3 (8%)           | 2 (8%)           | 7 (28%)          | 0.07 <sup>b</sup>  |
| Indirect causes                              | 11 (13%)         | 3 (8%)           | 5 (20%)          | 3 (12%)          | 0.39 <sup>b</sup>  |
| <i>Unknown</i>                               | 11 (11%)         | 2 (5%)           | 3 (11%)          | 6 (19%)          |                    |
| <b>Intraoperative findings</b>               |                  |                  |                  |                  |                    |
| Uterine rupture                              | 23 (23%)         | 7 (18%)          | 4 (14%)          | 12 (39%)         | 0.06 <sup>b</sup>  |
| Placental abruption                          | 11 (11%)         | 9 (23%)          | 2 (7%)           | 0                | <0.01 <sup>b</sup> |
| <b>Foetal death</b>                          |                  |                  |                  |                  |                    |
| Number of stillbirths (proportion)           | 44 (59%)         | 15 (63%)         | 12 (52%)         | 17 (63%)         | 0.73 <sup>b</sup>  |
| <i>Unknown</i>                               | 25 (25%)         | 16 (40%)         | 5 (18%)          | 4 (13%)          |                    |

a. Kruskal-Wallis test; b. Fisher-Freeman-Halton test; d. Causes with <5 occurrences not presented

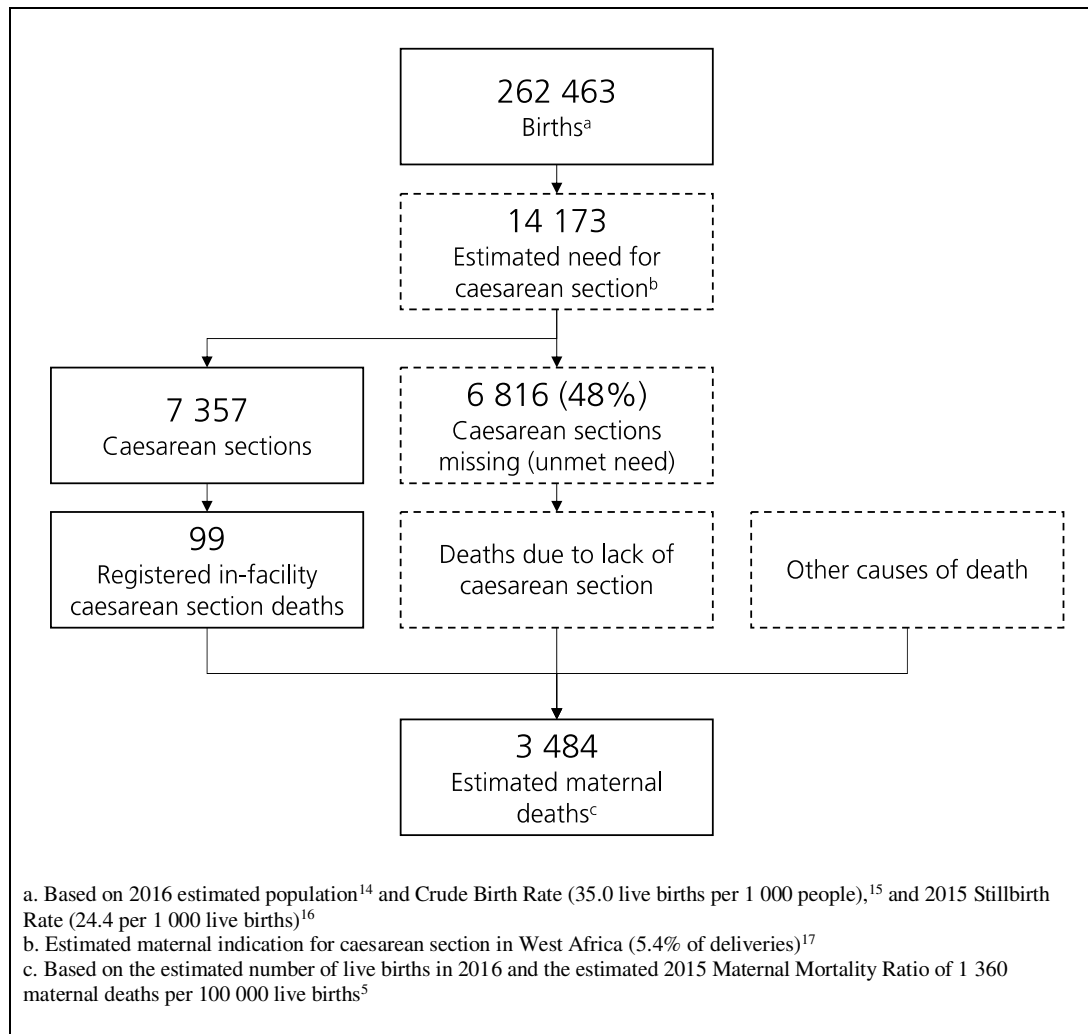

**Supplementary figure 1.** Estimated need for caesarean sections and relationship with maternal death in Sierra Leone in 2016

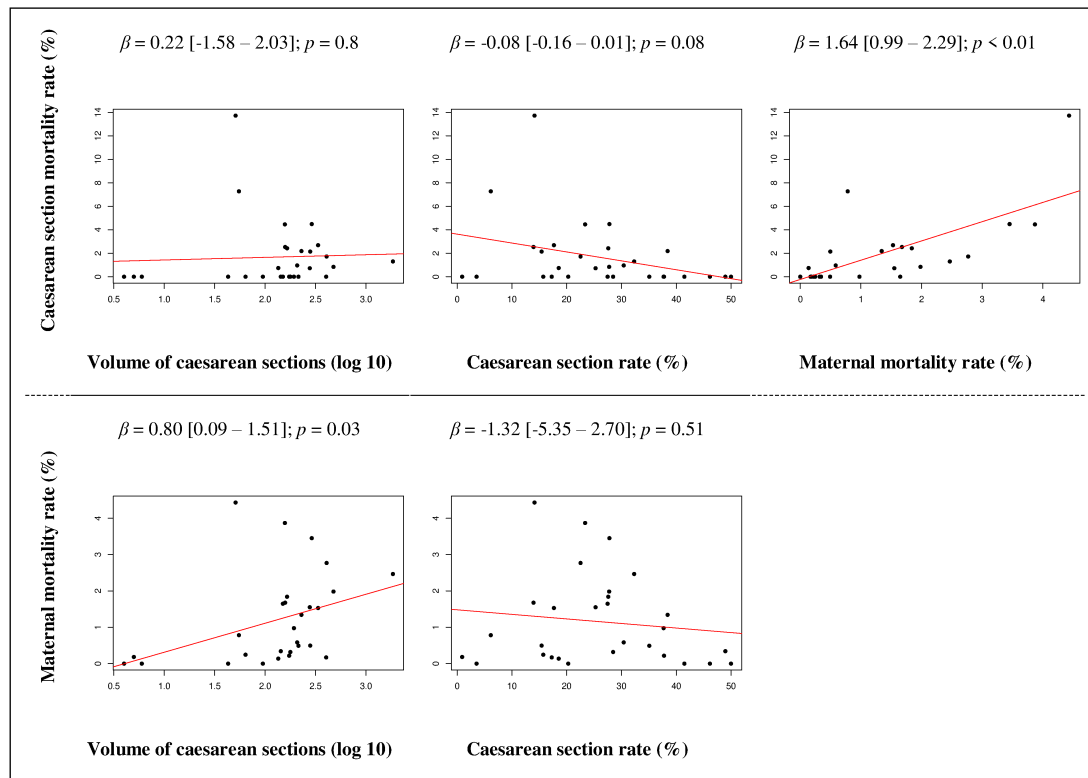

$\beta$ : Beta coefficient with 95% confidence interval

**Supplementary figure 2.** Linear regression findings for 29 facilities performing caesarean section in 2016 (excluding seven facilities that had one or more deaths per logbooks but reported no maternal deaths in the MDSR database)
